# Supplementary material for: Ionically conducting Li- and Na-phosphonates as organic electrode materials for rechargeable batteries
Source: Royal Society of Chemistry journal article supplement (doi:10.1039/d4sc07732f), 2024-12-23
Supplement: d4sc07732f1.pdf [file d4sc07732f1.pdf]

*Supporting Information:*

**Ionic Conducting Li- and Na-Phosphonates as Organic Electrode Materials for Rechargeable Batteries**

Yan Zhang<sup>§,a,b,c</sup>, Petru Apostol<sup>§,b</sup>, Darsi Rambabu<sup>b</sup>, Xiaolong Guo<sup>b</sup>, Xuelian Liu<sup>b</sup>, Xiaodong Lin<sup>b</sup>, Haijiao Xie<sup>d</sup>, Xiaohua Chen<sup>c</sup>, Koen Robeyns<sup>b</sup>, Jiande Wang<sup>b,\*</sup>, Junzhong Wang<sup>a,\*</sup>, Alexandru Vlad<sup>b,\*</sup>

<sup>a</sup> *School of Materials Science and Engineering, Anhui Graphene Carbon Fiber Research Center, Anhui University, Hefei, 230601 P. R. China.*

<sup>b</sup> *Institute of Condensed Matter and Nanosciences, Molecular Chemistry, Materials and Catalysis, Université catholique de Louvain, Louvain-la-Neuve, Belgium.*

<sup>c</sup> *College of Materials Science and Engineering, Hunan Province Key Laboratory for Advanced Carbon Materials and Applied Technology, Hunan University, Changsha 410082, Hunan, P. R. China.*

<sup>d</sup> *Hangzhou Yanqu Information Technology Co., Ltd.*

<sup>§</sup> *These authors contributed equally to this work.*

## Table of Contents

|                                                                                                                                                                                                                                                                |    |
|----------------------------------------------------------------------------------------------------------------------------------------------------------------------------------------------------------------------------------------------------------------|----|
| Materials and methods .....                                                                                                                                                                                                                                    | 4  |
| 1.1 Reagents and chemicals .....                                                                                                                                                                                                                               | 4  |
| 1.2 Synthesis procedure .....                                                                                                                                                                                                                                  | 4  |
| 1.2.1 Synthesis of methyl R-phosphinate ( $\text{CH}_3\text{O}-\text{CH}_3\text{P}$ and $\text{CH}_3\text{O}-\text{PhP}$ ) .....                                                                                                                               | 4  |
| 1.2.2 Syntheses of Dimethyl (2,5-dimethoxy-1,4-phenylene) bis(R-phosphinate) ( $(\text{CH}_3\text{O})_4-\text{Ph}-\text{CH}_3\text{P}$ and $(\text{CH}_3\text{O})_4-\text{Ph}-\text{PhP}$ ) .....                                                              | 4  |
| 1.2.3 Synthesis of $\text{H}_4-\text{Ph}-\text{CH}_3\text{P}$ and $\text{H}_4-\text{Ph}-\text{PhP}$ .....                                                                                                                                                      | 5  |
| 1.2.4 Synthesis of $\text{H}_{6-x}\text{Li}_x-\text{DOBDP}$ ( $0 < x < 6$ ), $\text{Li}_4-\text{Ph}-\text{CH}_3\text{P}$ and $\text{Li}_4-\text{Ph}-\text{PhP}$ .....                                                                                          | 5  |
| 1.2.5 Synthesis of $\text{Na}_4-\text{Ph}-\text{CH}_3\text{P}$ and $\text{Na}_4-\text{Ph}-\text{PhP}$ .....                                                                                                                                                    | 5  |
| 1.2.6 Synthesis of $\text{Na}_4-\text{Ph}-\text{PhP}$ crystals .....                                                                                                                                                                                           | 5  |
| 1.3 Materials characterizations .....                                                                                                                                                                                                                          | 6  |
| 1.4 Ionic conductivity test.....                                                                                                                                                                                                                               | 6  |
| 1.5 Electrochemical cell assembly and analysis .....                                                                                                                                                                                                           | 6  |
| 1.6 Density Functional Theory Simulation.....                                                                                                                                                                                                                  | 7  |
| Figure S1. (a) Comparative FTIR analysis of $\text{H}_6-\text{DOBDP}$ and $\text{H}_{6-x}\text{Li}_x-\text{DOBDP}$ , (b) Schematic illustration of lithiation reaction of $\text{H}_6-\text{DOBDP}$ by conventional liquid acid-base reaction conditions. .... | 8  |
| Table S1. List of the studied compounds with the full names and abbreviations.....                                                                                                                                                                             | 9  |
| Figure S2. $^1\text{H}$ NMR of $\text{CH}_3\text{O}-\text{CH}_3\text{P}$ in $\text{CDCl}_3$ . ....                                                                                                                                                             | 10 |
| Figure S3. $^1\text{H}$ NMR of $(\text{CH}_3\text{O})_4-\text{Ph}-\text{CH}_3\text{P}$ in $\text{CDCl}_3$ . ....                                                                                                                                               | 11 |
| Figure S4. $^1\text{H}$ NMR of $\text{H}_4-\text{Ph}-\text{CH}_3\text{P}$ in $\text{CD}_3\text{OD}$ .....                                                                                                                                                      | 12 |
| Figure S5. $^1\text{H}$ NMR of $\text{CH}_3\text{O}-\text{PhP}$ in $\text{CDCl}_3$ . ....                                                                                                                                                                      | 13 |
| Figure S6. $^1\text{H}$ NMR of $(\text{CH}_3\text{O})_4-\text{Ph}-\text{PhP}$ in $\text{CDCl}_3$ . ....                                                                                                                                                        | 14 |
| Figure S7. $^1\text{H}$ NMR of $\text{H}_4-\text{Ph}-\text{PhP}$ in $\text{DMSO}-d_6$ .....                                                                                                                                                                    | 15 |
| Figure S8. HR-MS of $\text{H}_4-\text{Ph}-\text{CH}_3\text{P}$ . ....                                                                                                                                                                                          | 16 |
| Figure S9. HR-MS of $\text{H}_4-\text{Ph}-\text{PhP}$ . ....                                                                                                                                                                                                   | 17 |
| Figure S10. PXRD patterns of synthesized materials.....                                                                                                                                                                                                        | 18 |
| Figure S11. TG of (a) $\text{A}_4-\text{Ph}-\text{CH}_3\text{P}$ , and (b) $\text{A}_4-\text{Ph}-\text{PhP}$ , $\text{A}=\text{Li}, \text{Na}$ . ....                                                                                                          | 19 |
| Figure S12. Density of state (DOS) of $\text{Li}_4-\text{Ph}-\text{CH}_3\text{P}$ , $\text{Na}_4-\text{Ph}-\text{CH}_3\text{P}$ , $\text{Li}_4-\text{Ph}-\text{PhP}$ , and $\text{Na}_4-\text{Ph}-\text{PhP}$ .....                                            | 20 |
| Figure S13. Nyquist plots of (a) $\text{Li}_4-\text{Ph}-\text{PhP}$ and (b) $\text{Na}_4-\text{Ph}-\text{PhP}$ from $20\text{ }^\circ\text{C}$ to $50\text{ }^\circ\text{C}$ . ....                                                                            | 21 |
| Table S2. Ionic conductivity calculation details for $\text{Li}_4-\text{Ph}-\text{PhP}$ and $\text{Na}_4-\text{Ph}-\text{PhP}$ , pellet area $\text{A}=0.785\text{ cm}^2$ , $\text{L}$ is the thickness of the pellets. ....                                   | 22 |
| Figure S14. X-ray crystal structure of $\text{Na}_4-\text{Ph}-\text{PhP}\cdot\text{CH}_3\text{OH}$ .....                                                                                                                                                       | 23 |
| Figure S15. PXRD patterns of $\text{Na}_4-\text{Ph}-\text{PhP}$ materials. ....                                                                                                                                                                                | 25 |
| Figure S16. The first charge and discharge voltage profiles at a rate of $0.1\text{C}$ for (a) $\text{Li}_4-\text{Ph}-\text{CH}_3\text{P}$ , (b) $\text{Na}_4-\text{Ph}-\text{CH}_3\text{P}$ electrode materials. ....                                         | 26 |

Figure S17. Photographs of glass fiber separator from (a)  $\text{Li}_4\text{-Ph-CH}_3\text{P}$  and (b)  $\text{Na}_4\text{-Ph-CH}_3\text{P}$  cells after the first charge/discharge process. ....27

Figure S18 (a) Ex-situ FTIR spectroscopy analysis of  $\text{Na}_4\text{-Ph-PhP}$  in different charge and discharge state, (b) redox mechanism of  $\text{A}_4\text{-Ph-RP}$ . ....28

## Materials and methods

### 1.1 Reagents and chemicals

Benzene, 1,4-Dibromo-2,5-dimethoxybenzene, tetrakis (triphenylphosphine) palladium (0) ( $\text{Pd}(\text{PPh}_3)_4$ ) and 1,4-dioxane were purchased from TCI chemicals. Dichlorophenylphosphine ( $\text{PhPCl}_2$ ), methyldichlorophosphane ( $\text{CH}_3\text{PCl}_2$ ) and dichloromethane (DCM) were purchased from FisherSci. Boron tribromide ( $\text{BBr}_3$ , 1 M soln. in dichloromethane) and anhydrous methanol ( $\text{CH}_3\text{OH}$ ) were purchased from Alfa Aesar. Sodium sulphate anhydrous and diethyl ether were purchased from VWR Chemicals. Triethylamine (TEA) was purchased from Acros Organics. Lithium methoxide ( $\text{LiOCH}_3$ ) and sodium methoxide ( $\text{NaOCH}_3$ ) were purchased from Sigma Aldrich. 2,5-Dihydroxy-1,4-benzenediphosphonic acid ( $\text{H}_6\text{-DOBDP}$ ) was obtained by from Epsilon Chimie. All chemicals were used as received.

### 1.2 Synthesis procedure

#### 1.2.1 Synthesis of methyl R-phosphinate ( $\text{CH}_3\text{O-CH}_3\text{P}$ and $\text{CH}_3\text{O-PhP}$ )

A first flask was charged with  $\text{R-PCl}_2$  ( $\text{R}=\text{CH}_3$  or  $\text{Ph}$ ), three times evacuated and flushed with argon (Ar), and diluted with dry benzene (8 mL per 1 g of  $\text{R-PCl}_2$ ). In a second flask, 2.4 molar equivalents of dry methanol were mixed with 1 molar equivalent of dry triethylamine under Ar atmosphere. The mixture was cooled in an ice bath, and the solution of  $\text{R-PCl}_2$  was added slowly. The formed precipitate was filtered and the filtrate was evaporated to form an oily product which was directly used without further purification.

**$\text{CH}_3\text{O-CH}_3\text{P}$ :** Yield: 43 %.  $^1\text{H NMR}$  (300 MHz,  $\text{CDCl}_3$ )  $\delta$  7.97 (q,  $J = 2.1$  Hz, 0.5H), 6.17 (q,  $J = 2.1$  Hz, 0.5H), 3.68 (d,  $J = 12.1$  Hz, 3H), 1.43 (ddd,  $J = 15.1, 8.9, 2.1$  Hz, 3H).

**$\text{CH}_3\text{O-PhP}$ :** Yield: 75 %.  $^1\text{H NMR}$  (300 MHz,  $\text{CDCl}_3$ )  $\delta$  8.41 (s, 0.5H), 7.75-7.66 (m, 2H), 7.56-7.48 (m, 1H), 7.47-7.38 (m, 2H), 6.53 (s, 0.5H), 3.72-3.66 (m, 3H).

#### 1.2.2 Syntheses of Dimethyl (2,5-dimethoxy-1,4-phenylene) bis(R-phosphinate) ( $(\text{CH}_3\text{O})_4\text{-Ph-CH}_3\text{P}$ and $(\text{CH}_3\text{O})_4\text{-Ph-PhP}$ )

A mixture of 3.55 g of 1,4-Dibromo-2,5-dimethoxybenzene (12 mmol) and 1 g of  $\text{Pd}(\text{PPh}_3)_4$  (0.86 mmol) was added into a flask under an Ar atmosphere. Then, 125 mL dry 1,4-dioxane was added, followed by 4.0 mL dry triethylamine (28 mmol) and  $\text{CH}_3\text{O-CH}_3\text{P}$  (36 mmol) (or  $\text{CH}_3\text{O-PhP}$  (36 mmol)). The mixture was stirred at 60 °C for 96 hours. After cooling to room temperature, the formed precipitate was filtered off and the filtrate was evaporated to dryness. The solid residue was dissolved in DCM and washed with water 3 times. The purification process was individual for each product, as seen below.

**$(\text{CH}_3\text{O})_4\text{-Ph-CH}_3\text{P}$ :** The DCM phase was evaporated to dryness to obtain a light-yellow powder with high purity. Yield: 27%.  $^1\text{H NMR}$  (300 MHz,  $\text{CDCl}_3$ )  $\delta$  7.66-7.52 (m, 2H), 3.99-3.79 (m, 6H), 3.67-3.50 (m, 6H), 1.77 (ddd,  $J = 15.6, 5.7, 3.8$  Hz, 6H).

**(CH<sub>3</sub>O)<sub>4</sub>-Ph-PhP**: The organic phase was dried over sodium sulfate (anhydrous). The solution was evaporated, and the product was precipitated by adding diethyl ether, then filtered off and dried at 80 °C to get (CH<sub>3</sub>O)<sub>4</sub>-Ph-PhP as a light-yellow powder. Yield: 66%. <sup>1</sup>H NMR (300 MHz, CDCl<sub>3</sub>) δ 7.95-7.76 (m, 4H), 7.61-7.55 (m, 2H), 7.52-7.48 (m, 2H), 7.47-7.38 (m, 4H), 3.83-3.66 (m, 12H).

### 1.2.3 Synthesis of H<sub>4</sub>-Ph-CH<sub>3</sub>P and H<sub>4</sub>-Ph-PhP

To a solution of (CH<sub>3</sub>O)<sub>4</sub>-Ph-CH<sub>3</sub>P (or (CH<sub>3</sub>O)<sub>4</sub>-Ph-PhP) in DCM under Ar atmosphere, 7 molar equivalents of BBr<sub>3</sub> (1 M in DCM) was added dropwise at 0 °C. After 24 hours, DI-water (20 ml) was added to quench the reaction, then filtered off and washed with DCM, and dried at 80 °C.

**H<sub>4</sub>-Ph-CH<sub>3</sub>P**: <sup>1</sup>H NMR (300 MHz, MeOD) δ 7.16 (dd, J = 14.0, 6.5 Hz, 2H), 1.75 (dd, J = 19.6, 16.1 Hz, 6H).

**H<sub>4</sub>-Ph-PhP**: <sup>1</sup>H NMR (300 MHz, DMSO) δ 10.47 (s, 4H), 7.81-7.68 (m, 4H), 7.54 (ddt, J = 6.0, 2.9, 1.4 Hz, 2H), 7.51-7.41 (m, 4H), 7.22-6.77 (m, 2H).

### 1.2.4 Synthesis of H<sub>6-x</sub>Li<sub>x</sub>-DOBDP (0 < x < 6), Li<sub>4</sub>-Ph-CH<sub>3</sub>P and Li<sub>4</sub>-Ph-PhP

The lithiation was performed in anhydrous methanol with a stoichiometric amount of lithium methoxide. The mixture was stirred at room temperature inside an Ar-filled glovebox for 24 hours, and then added diethyl ether to wash it for three times. After filtration, H<sub>6-x</sub>Li<sub>x</sub>-DOBDP, Li<sub>4</sub>-Ph-CH<sub>3</sub>P and Li<sub>4</sub>-Ph-PhP were transferred to a BUCHI glass oven to remove methanol and diethyl ether at 140 °C, 150 °C and 220 °C, respectively.

### 1.2.5 Synthesis of Na<sub>4</sub>-Ph-CH<sub>3</sub>P and Na<sub>4</sub>-Ph-PhP

The sodiation was carried out in anhydrous methanol with a stoichiometric amount of sodium methoxide. This mixture was stirred at room temperature for 24 hours inside an Ar-filled glovebox, and washed with diethyl ether. After filtered, Na<sub>4</sub>-Ph-CH<sub>3</sub>P and Na<sub>4</sub>-Ph-PhP were transferred to a BUCHI glass oven to remove methanol and diethyl ether at 150 °C and 220 °C, respectively.

### 1.2.6 Synthesis of Na<sub>4</sub>-Ph-PhP crystals

Needle-shaped crystals of Na<sub>4</sub>-Ph-PhP, suitable for X-ray analysis, were obtained by slow diffusion of diethyl ether into a methanolic solution of Na<sub>4</sub>-Ph-PhP (1.5 mg mL<sup>-1</sup>) at room temperature in an argon filled glove box over three days.

### 1.3 Materials characterizations

Powder X-ray diffraction (PXRD) was acquired using a STOE Stadi P diffractometer equipped with monochromated Mo K $\alpha$  radiation. Patterns were collected in the 2 $\theta$  range of 2-35°. FTIR spectroscopy was carried out on pristine powders using an Agilent Technologies Cary 630 spectrometer with a Single reflection ATR module. Thermogravimetric analysis (TGA) was carried out under argon with a SENSYSeco instrument from Setaram at a heating rate of 10 °C min<sup>-1</sup> between 25 and 800 °C.

#### X-ray crystallography

Single crystal X-ray data collection on Na<sub>4</sub>-Ph-PhP was carried out on a MAR345 image plate detector using Mo-K $\alpha$  radiation (0.71073 Å) generated by an Incoatec I $\mu$ S microfocus source (Montel mirrors). Data integration and reduction were performed by CrysAlis<sup>PRO</sup>[1] and the implemented absorption correction was applied. Beyond 0.93 Å the crystal diffracted poorly and a data cut-off was imposed during integration. The structure solution was performed by dual-space direct methods in SHELXT[2] and the structure was further refined against  $F^2$  using SHELXL2019/3[3]. Non-hydrogen atoms were refined anisotropically; H<sub>CH</sub> atoms were added in calculated positions; H<sub>OH</sub> atoms were either located from a Fourier map or added in calculated positions and refined in riding mode. Symmetry analysis and validation were carried out using PLATON.[4] Figures were made using the molecular visualization software Mercury v4.3.[5] CCDC 2401944 includes the supplementary crystallographic data and can be downloaded free of charge from The Cambridge Crystallographic Data Centre via [www.ccdc.cam.ac.uk/structures](http://www.ccdc.cam.ac.uk/structures).

### 1.4 Ionic conductivity test

Pellets (10 mm in diameter) were prepared by cold pressing the powders at an applied pressure of 5.0 T for 2 min under a protective Ar atmosphere. The powder was pressed between two carbon coated Aluminum foils to insure a good contact. In Ar-filled glovebox, the pellets were assembled in home-made Swagelok cells, and transferred to a climatic chamber for variable temperature tests. Measurements were performed over a frequency range of 1 MHz to 100 mHz using a 10 mV applied alternating current signal.

### 1.5 Electrochemical cell assembly and analysis

The two electrodes coin cells (2032-type) were assembled with Li<sub>4</sub>-Ph-CH<sub>3</sub>P and Li<sub>4</sub>-Ph-PhP as working electrode material, and lithium foil as counter and pseudo-reference electrode. Glass microfiber filters (Whatman GF/D, Aldrich) were used as separators. A typical working electrode was composed of 50 wt.% active material, 40 wt.% of super P carbon and 10 wt.% of PTFE by hand grinding. Mass loading for the positive electrodes was in the range of 3-6 mg cm<sup>-2</sup>. 2M LiCF<sub>3</sub>SO<sub>3</sub> and 2M NaCF<sub>3</sub>SO<sub>3</sub> in diglyme were used as electrolyte for lithium and sodium ion batteries.

## 1.6 Density Functional Theory Simulation

All calculations were carried out with the Gaussian 16 software.<sup>[6]</sup> The B3LYP functional was adopted for all calculations. For geometry optimization and frequency calculations, the def2-SVP<sup>[7]</sup> basis set was used, and the optimal geometry for each compound was determined. The singlet point energy calculations were performed with a larger basis set def2-TZVP basis set. The DFT-D3 dispersion correction with BJ-damping <sup>[8]</sup> was applied to correct the weak interaction to improve the calculation accuracy. Orbital energy level analysis and density-of-states analysis were performed by Multiwfn package.<sup>[9]</sup> The visualization of the orbitals for Li<sub>4</sub>-Ph-CH<sub>3</sub>P, Na<sub>4</sub>-Ph-CH<sub>3</sub>P, Li<sub>4</sub>-Ph-PhP and Na<sub>4</sub>-Ph-PhP were achieved using VMD software.

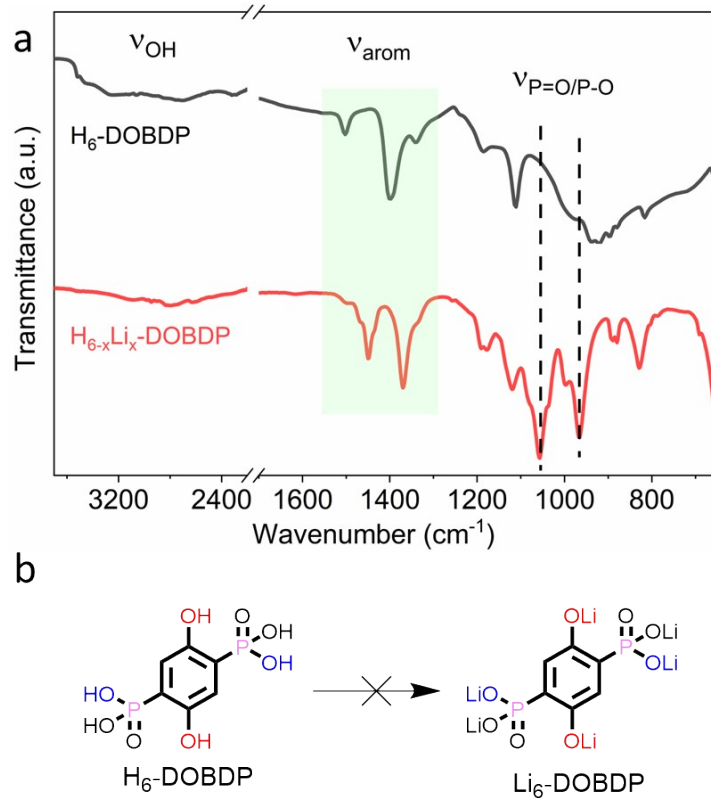

**Figure S1.** (a) Comparative FTIR analysis of  $\text{H}_6\text{-DOBDP}$  and  $\text{H}_{6-x}\text{Li}_x\text{-DOBDP}$ , (b) Schematic illustration of lithiation reaction of  $\text{H}_6\text{-DOBDP}$  by conventional liquid acid-base reaction conditions.



**Table S1. List of the studied compounds with the full names and abbreviations.**

| Compounds                                                                           | Full names                                                     | Abbreviations                                          |
|-------------------------------------------------------------------------------------|----------------------------------------------------------------|--------------------------------------------------------|
| 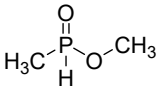   | Methyl methyl-phosphinate                                      | CH <sub>3</sub> O-CH <sub>3</sub> P                    |
|    | Methyl phenyl-phosphinate                                      | CH <sub>3</sub> O-PhP                                  |
|    | Dimethyl (2,5-dimethoxy-1,4-phenylene) bis(methyl-phosphinate) | (CH <sub>3</sub> O) <sub>4</sub> -Ph-CH <sub>3</sub> P |
|    | Dimethyl (2,5-dimethoxy-1,4-phenylene) bis(phenyl-phosphinate) | (CH <sub>3</sub> O) <sub>4</sub> -Ph-PhP               |
|   | phenylene-1,4-bis(methylphosphinic acid)                       | H <sub>4</sub> -Ph-CH <sub>3</sub> P                   |
|  | phenylene-1,4-bis(phenylphosphinic acid)                       | H <sub>4</sub> -Ph-PhP                                 |
|  | Tetralithium bis(methylphosphinate)                            | Li <sub>4</sub> -Ph-CH <sub>3</sub> P                  |
|  | Tetrasodium bis(methylphosphinate)                             | Na <sub>4</sub> -Ph-CH <sub>3</sub> P                  |
|  | Tetralithium bis(phenylphosphinate)                            | Li <sub>4</sub> -Ph-PhP                                |
|  | Tetrasodium bis(phenylphosphinate)                             | Na <sub>4</sub> -Ph-PhP                                |

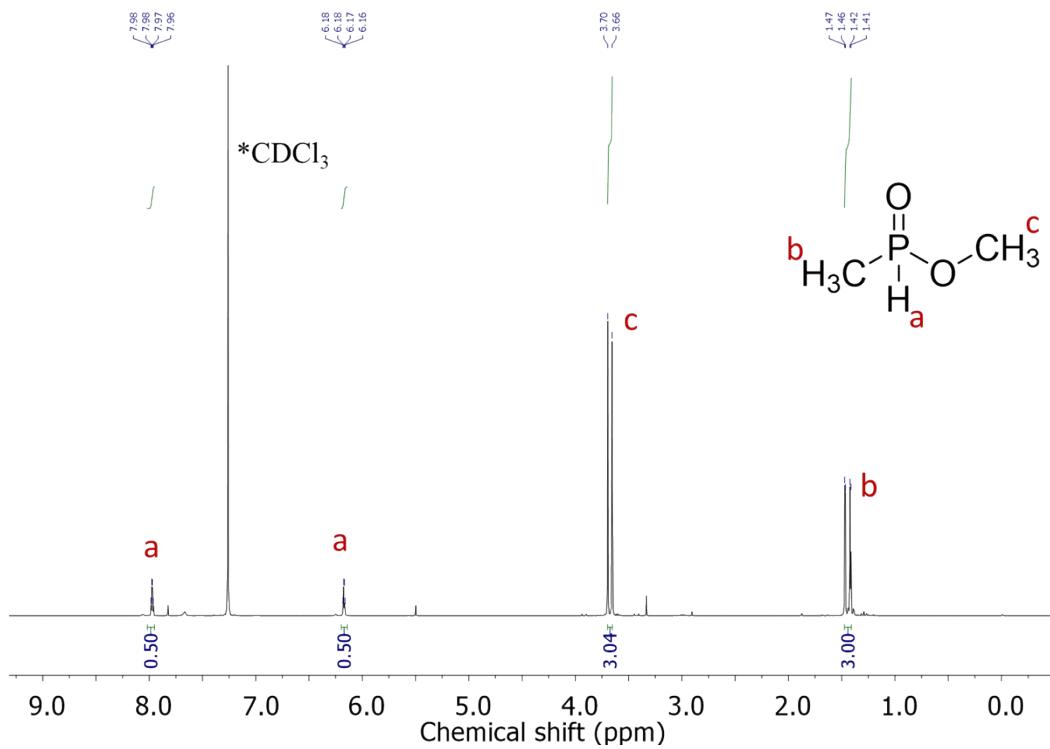

**Figure S2.**  $^1\text{H}$  NMR of  $\text{CH}_3\text{O}-\text{CH}_3\text{P}$  in  $\text{CDCl}_3$ .

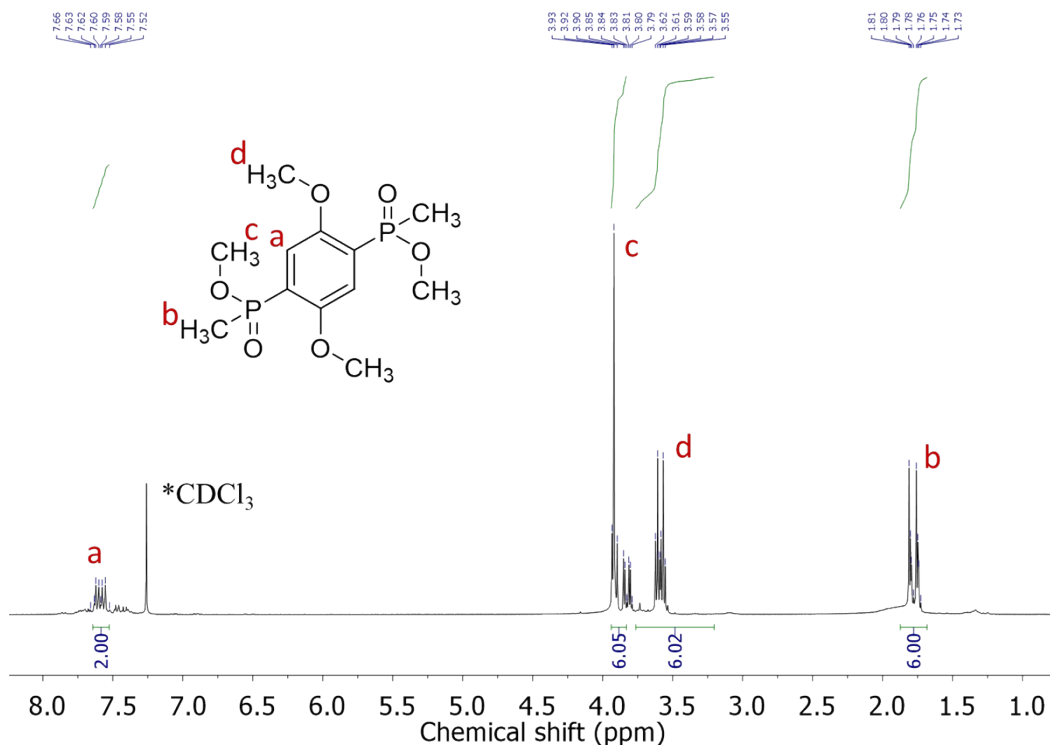

**Figure S3.**  $^1\text{H}$  NMR of  $(\text{CH}_3\text{O})_4\text{-Ph-CH}_3\text{P}$  in  $\text{CDCl}_3$ .

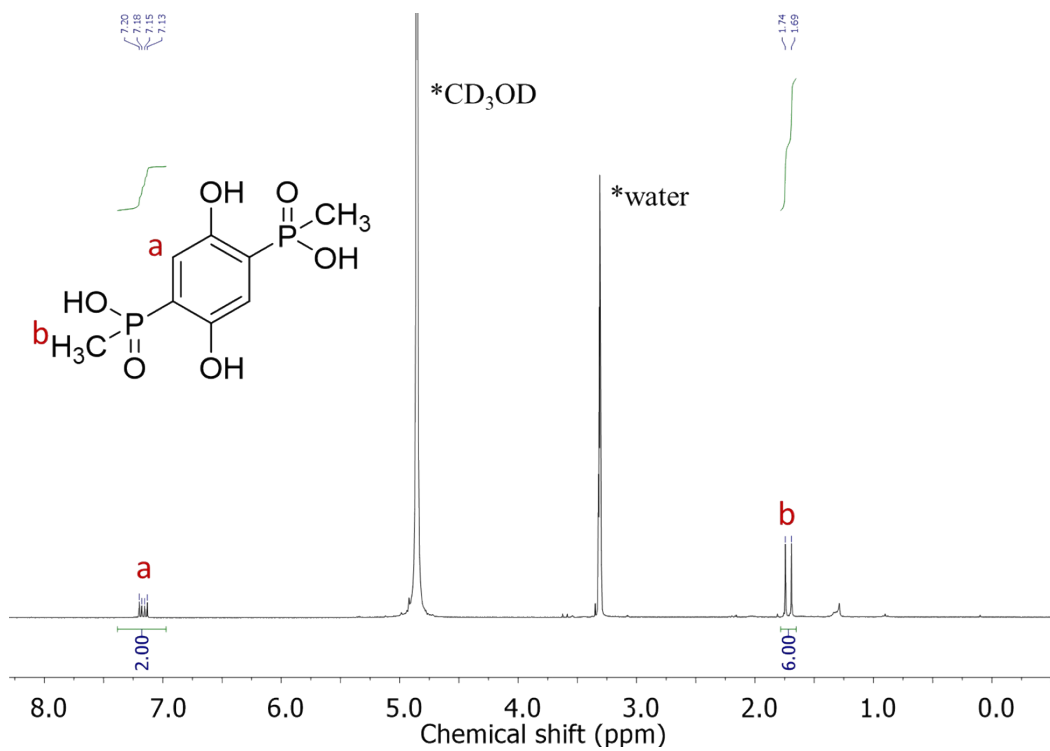

Figure S4.  $^1\text{H}$  NMR of  $\text{H}_4\text{-Ph-CH}_3\text{P}$  in  $\text{CD}_3\text{OD}$ .

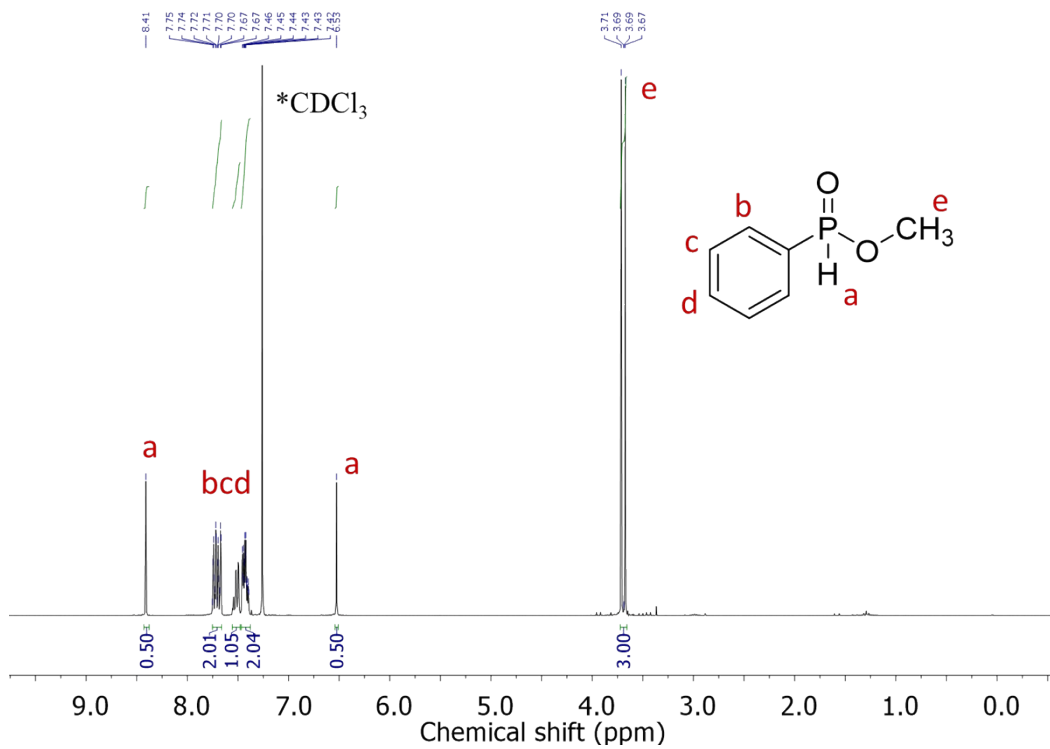

Figure S5.  $^1\text{H}$  NMR of  $\text{CH}_3\text{O-PhP}$  in  $\text{CDCl}_3$ .

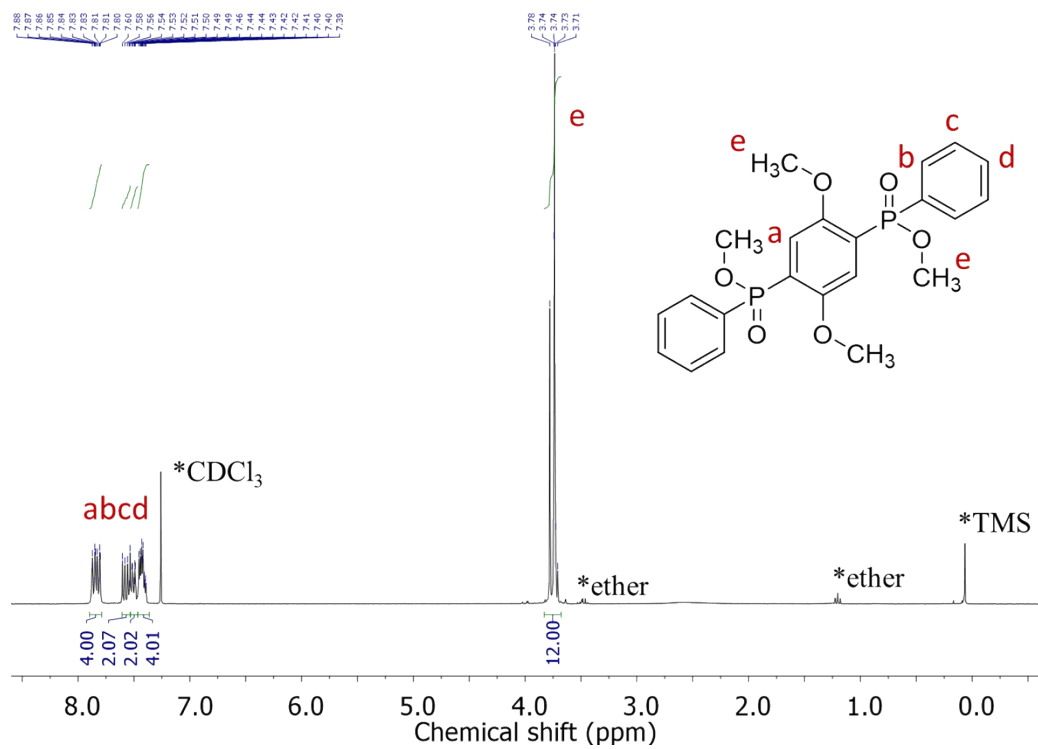

Figure S6.  $^1\text{H}$  NMR of  $(\text{CH}_3\text{O})_4\text{-Ph-PhP}$  in  $\text{CDCl}_3$ .

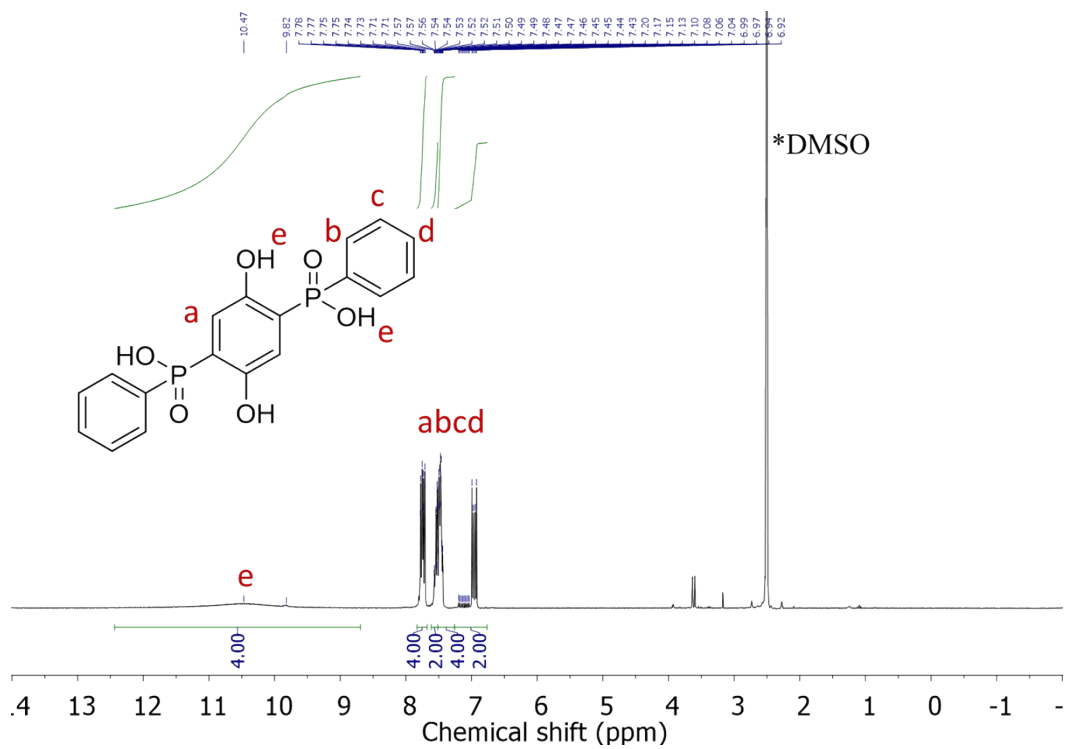

Figure S7.  $^1\text{H}$  NMR of  $\text{H}_4\text{-Ph-PhP}$  in  $\text{DMSO-d}_6$ .

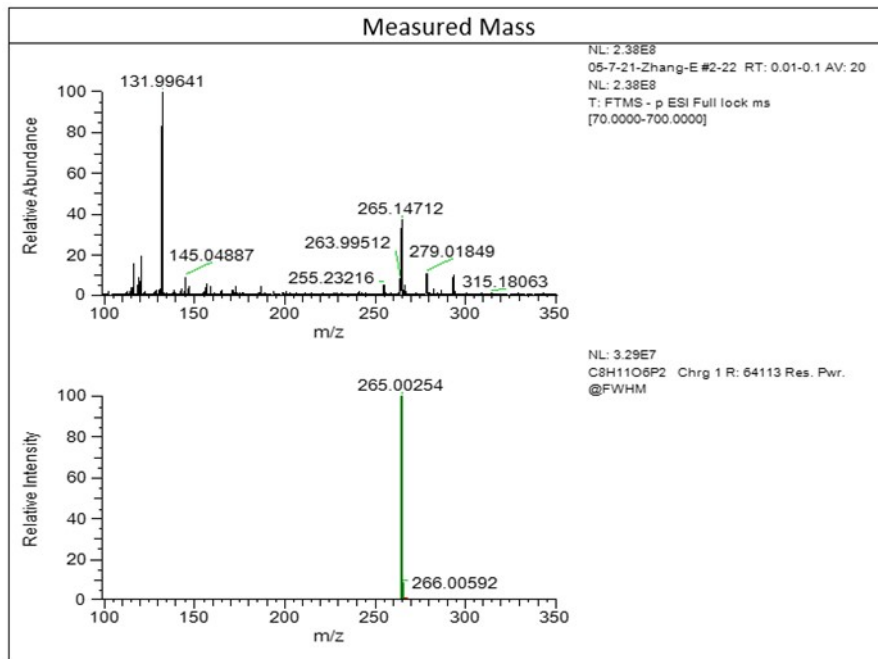

**Figure S8.** HR-MS of H<sub>4</sub>-Ph-CH<sub>3</sub>P.



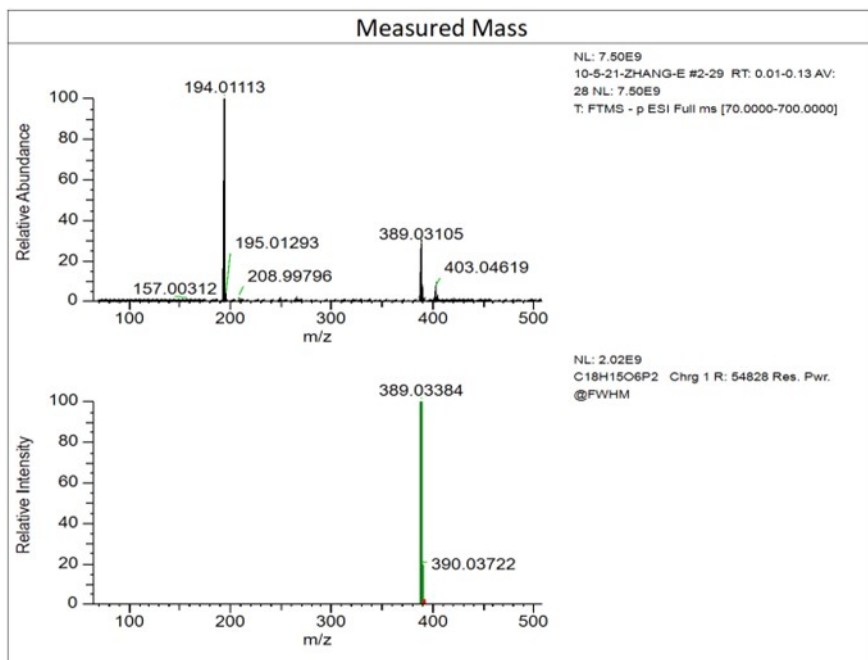

Figure S9. HR-MS of H<sub>4</sub>-Ph-PhP.

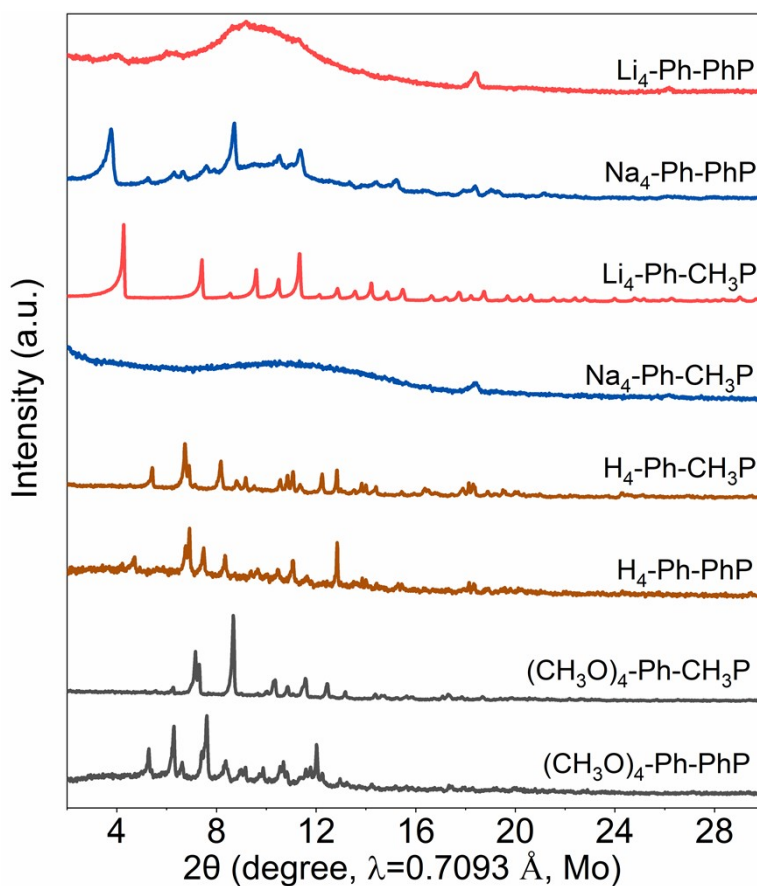

**Figure S10.** PXRD patterns of synthesized materials.

PXRD analysis revealed a crystalline phase for Na<sub>4</sub>-Ph-PhP and Li<sub>4</sub>-Ph-CH<sub>3</sub>P, and amorphous phases for Li<sub>4</sub>-Ph-PhP and Na<sub>4</sub>-Ph-CH<sub>3</sub>P (**Figure S10**). Furthermore, the diffraction peaks located at  $2\theta=3.7^\circ$ ,  $6.1^\circ$ ,  $8.7^\circ$ ,  $11.2^\circ$  and  $18.4^\circ$  suggest the possible similar crystal structure of Li<sub>4</sub>-Ph-PhP and Na<sub>4</sub>-Ph-PhP.

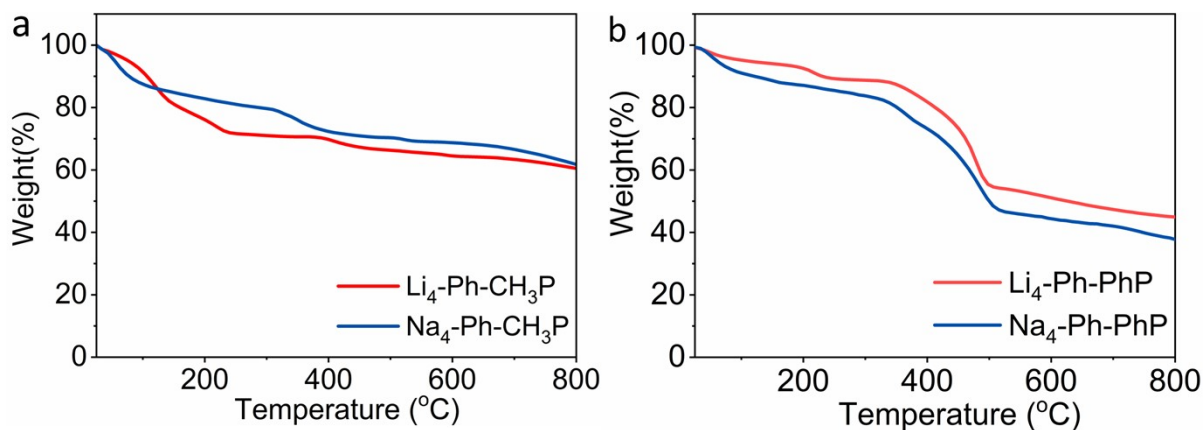

**Figure S11.** TG of (a) A<sub>4</sub>-Ph-CH<sub>3</sub>P, and (b) A<sub>4</sub>-Ph-PhP, A=Li, Na.

As shown in **Figure S11a**, Li<sub>4</sub>-Ph-CH<sub>3</sub>P and Na<sub>4</sub>-Ph-CH<sub>3</sub>P exhibits a weight loss of approximately 30 % and 20 % from room temperature to 260 °C, mainly due to the evaporation of residual methanol solvent. After solvent removal, the thermal stability of Li<sub>4</sub>-Ph-CH<sub>3</sub>P and Na<sub>4</sub>-Ph-CH<sub>3</sub>P is around 360 °C and 310 °C, respectively. Li<sub>4</sub>-phle-phP and Na<sub>4</sub>-phle-phP show noticeable weight loss from the onset of heating to 300 °C, with weight losses of 11 % and 17 % of the initial sample weight, respectively. This is primarily attributed to the slow evaporation of residual methanol solvent from the materials. As the temperature continues to rise from 340 °C to 800 °C, both Li<sub>4</sub>-phle-phP and Na<sub>4</sub>-phle-phP materials experience weight losses of 43 % and 45 %, respectively, indicating decomposition and carbonization of the materials (**Figure S11b**).

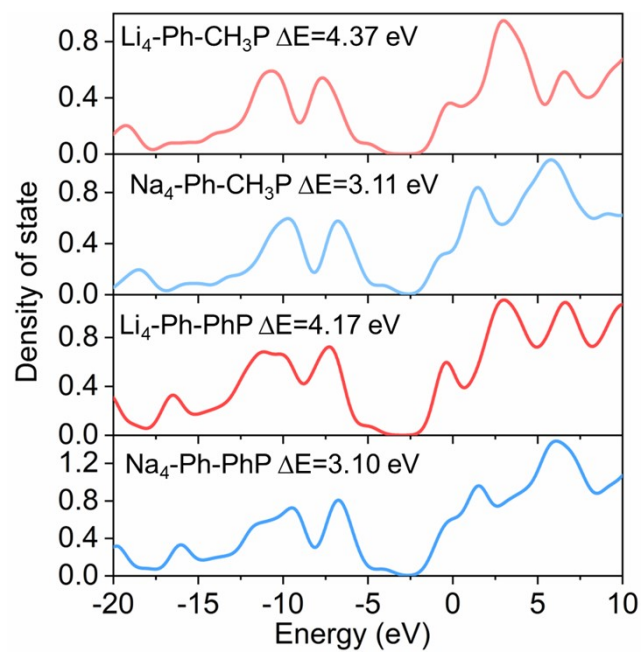

**Figure S12.** Density of state (DOS) of  $\text{Li}_4\text{-Ph-CH}_3\text{P}$ ,  $\text{Na}_4\text{-Ph-CH}_3\text{P}$ ,  $\text{Li}_4\text{-Ph-PhP}$ , and  $\text{Na}_4\text{-Ph-PhP}$ .

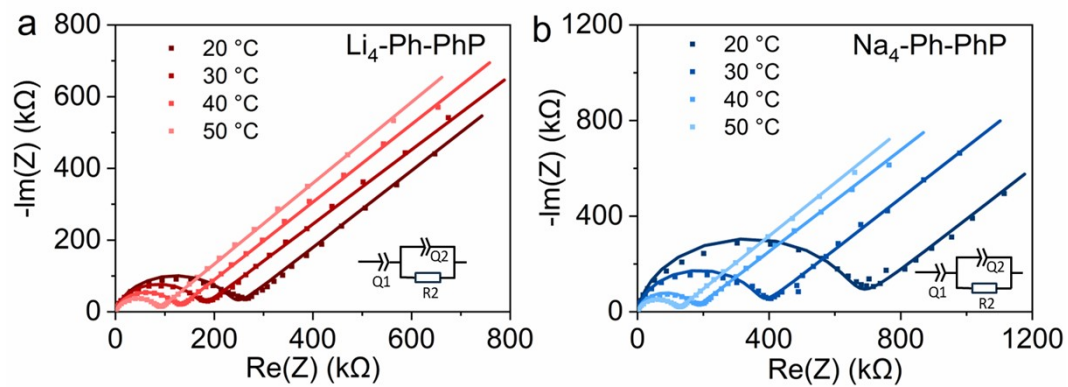

**Figure S13.** Nyquist plots of (a)  $\text{Li}_4\text{-Ph-PhP}$  and (b)  $\text{Na}_4\text{-Ph-PhP}$  from 20 °C to 50 °C.

**Table S2. Ionic conductivity calculation details for Li<sub>4</sub>-Ph-PhP and Na<sub>4</sub>-Ph-PhP, pellet area A=0.785 cm<sup>2</sup>, L is the thickness of the pellets.**

| Sample                  | T (°C) | R <sub>2</sub> (KΩ) | L (cm) | σ (S cm <sup>-1</sup> ) |
|-------------------------|--------|---------------------|--------|-------------------------|
| Li <sub>4</sub> -Ph-PhP | 50     | 82.365              | 0.040  | 6.1×10 <sup>-7</sup>    |
|                         | 40     | 118.153             | 0.036  | 3.8×10 <sup>-7</sup>    |
|                         | 30     | 163.575             | 0.034  | 2.6×10 <sup>-7</sup>    |
|                         | 20     | 232.779             | 0.030  | 1.6×10 <sup>-7</sup>    |
| Na <sub>4</sub> -Ph-PhP | 50     | 113.903             | 0.040  | 4.4×10 <sup>-7</sup>    |
|                         | 40     | 162.846             | 0.036  | 2.8×10 <sup>-7</sup>    |
|                         | 30     | 357.652             | 0.040  | 1.4×10 <sup>-7</sup>    |
|                         | 20     | 638.128             | 0.042  | 8.3×10 <sup>-8</sup>    |

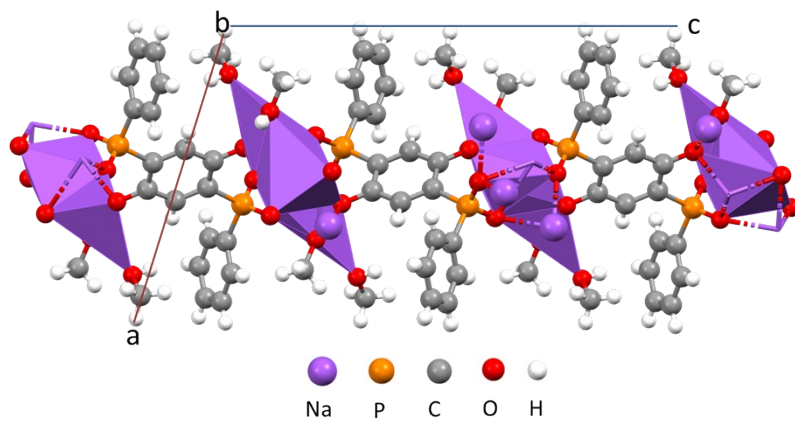

**Figure S14.** X-ray crystal structure of  $\text{Na}_4\text{-Ph-PhP}\cdot\text{CH}_3\text{OH}$ .

**Table S3.** Crystal data and structure refinement for Na<sub>4</sub>-Ph-PhP.

| Empirical formula                   | C <sub>22</sub> H <sub>28</sub> Na <sub>4</sub> O <sub>10</sub> P <sub>2</sub> |
|-------------------------------------|--------------------------------------------------------------------------------|
| Formula weight                      | 606.34                                                                         |
| Temperature/K                       | 150.15                                                                         |
| Crystal system                      | monoclinic                                                                     |
| Space group                         | P 21/c                                                                         |
| a/Å                                 | 12.6672(14)                                                                    |
| b/Å                                 | 6.1624(6)                                                                      |
| c/Å                                 | 18.016(2)                                                                      |
| α/°                                 | 90                                                                             |
| β/°                                 | 106.967(12)                                                                    |
| γ/°                                 | 90                                                                             |
| Volume/Å <sup>3</sup>               | 1345.1(3)                                                                      |
| Z                                   | 2                                                                              |
| ρ <sub>calc</sub> g/mm <sup>3</sup> | 1.497                                                                          |
| μ /mm <sup>-1</sup>                 | 0.814                                                                          |
| F(000)                              | 628                                                                            |
| Crystal size/mm <sup>3</sup>        | 0.25 × 0.03 × 0.01                                                             |
| Index ranges                        | -14 ≤ h ≤ 14, -6 ≤ k ≤ 6, -20 ≤ l ≤ 19                                         |
| Reflections collected               | 7054                                                                           |
| Independent reflections             | 1878[R(int) = 0.1125]                                                          |
| Data/restraints/parameters          | 1878/0/127                                                                     |
| Goodness-of-fit on F <sup>2</sup>   | 1.116                                                                          |
| Final R indexes [I ≥ 2σ (I)]        | R <sub>1</sub> = 0.0878, wR <sub>2</sub> = 0.1694                              |
| Final R indexes [all data]          | R <sub>1</sub> = 0.1318, wR <sub>2</sub> = 0.1060                              |



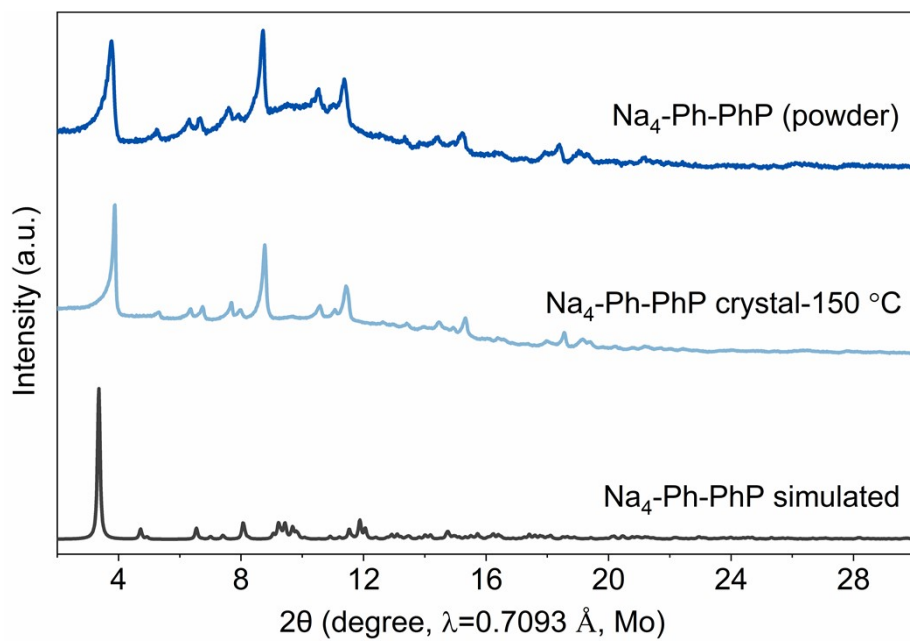

**Figure S15.** PXRD patterns of  $\text{Na}_4\text{-Ph-PhP}$  materials.

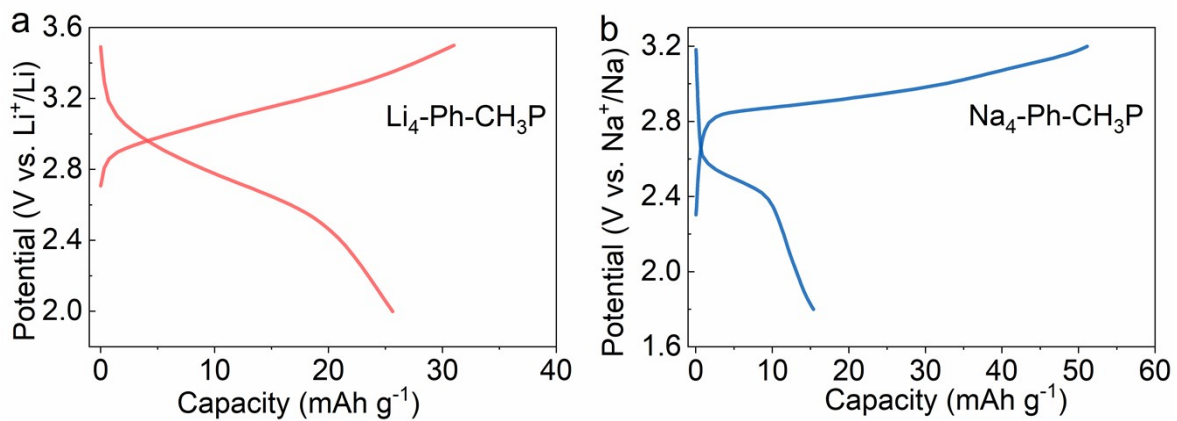

**Figure S16.** The first charge and discharge voltage profiles at a rate of 0.1C for (a) Li<sub>4</sub>-Ph-CH<sub>3</sub>P, (b) Na<sub>4</sub>-Ph-CH<sub>3</sub>P electrode materials.

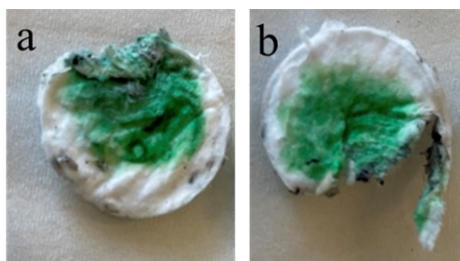

**Figure S17.** Photographs of glass fiber separator from (a)  $\text{Li}_4\text{-Ph-CH}_3\text{P}$  and (b)  $\text{Na}_4\text{-Ph-CH}_3\text{P}$  cells after the first charge/discharge process.

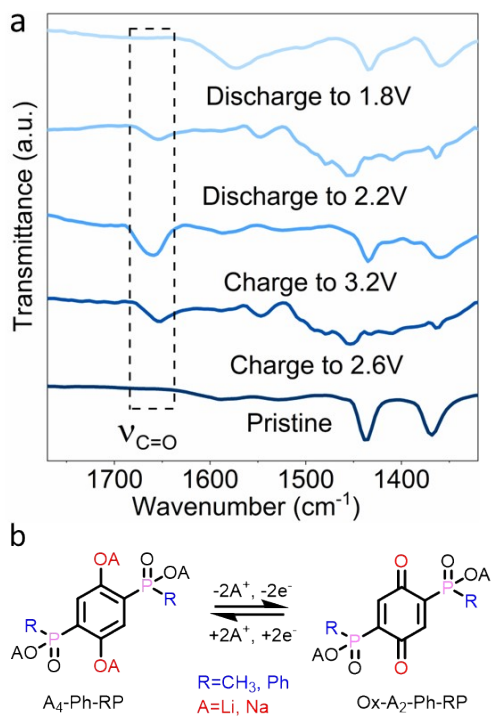

**Figure S18** (a) Ex-situ FTIR spectroscopy analysis of  $\text{Na}_4\text{-Ph-PhP}$  in different charge and discharge state, (b) redox mechanism of  $\text{A}_4\text{-Ph-RP}$ .

To have a better comprehension of the redox mechanism for  $\text{Na}_4\text{-Ph-PhP}$  electrodes, ex-situ FTIR analysis was performed over one full charge/discharge cycle (**Figure S18**). The results reveal the appearance of a new band at  $\sim 1654\text{ cm}^{-1}$  (charge to 2.6 V) due to the formation of quinonoid/semiquinone radical ( $1e^-$  oxidized), which became more intense and shifted to high frequency indicating the formation quinone band ( $\text{C}=\text{O}$ ,  $2e^-$  oxidized) when fully charged to 3.2 V. During the discharging process, the reversible appearance of ( $1e^-$  reduced) semiquinone radical  $\text{C}=\text{O}$  vibration bond has partially faded (discharge to 2.2 V) and then completely vanished (1.8 V, phenolate,  $2e^-$  reduced), indicating the reversibility of the electrochemical process at the molecular level.

## References

- [1] CrysAlisPro, version 1.171.37.35; Rigaku Oxford Diffraction.
- [2] Sheldrick, G. M. (2015). *Acta Cryst.* A71, 3-8.
- [3] Sheldrick, G. M. (2015). *Acta Cryst.* C71, 3-8.
- [4] Spek, A. L. (2009). *Acta Cryst.* D65, 148-155.
- [5] C. F. Macrae, I. Sovago, S. J. Cottrell, P. T. A. Galek, P. McCabe, E. Pidcock, M. Platings, G. P. Shields, J. S. Stevens, M. Towler and P. A. Wood, *J. Appl. Cryst.*, 53, 226-235, 2020.
- [6] M. J. Frisch, G. W. Trucks, H. B. Schlegel, G. E. Scuseria, M. A. Robb, J. R. Cheeseman, G. Scalmani, V. Barone, G. A. Petersson, H. Nakatsuji, X. Li, M. Caricato, A. V. Marenich, J. Bloino, B. G. Janesko, R. Gomperts, B. Mennucci, H. P. Hratchian, J. V. Ortiz, A. F. Izmaylov, J. L. Sonnenberg, Williams, F. Ding, F. Lipparini, F. Egidi, J. Goings, B. Peng, A. Petrone, T. Henderson, D. Ranasinghe, V. G. Zakrzewski, J. Gao, N. Rega, G. Zheng, W. Liang, M. Hada, M. Ehara, K. Toyota, R. Fukuda, J. Hasegawa, M. Ishida, T. Nakajima, Y. Honda, O. Kitao, H. Nakai, T. Vreven, K. Throssell, J. A. Montgomery Jr., J. E. Peralta, F. Ogliaro, M. J. Bearpark, J. J. Heyd, E. N. Brothers, K. N. Kudin, V. N. Staroverov, T. A. Keith, R. Kobayashi, J. Normand, K. Raghavachari, A. P. Rendell, J. C. Burant, S. S. Iyengar, J. Tomasi, M. Cossi, J. M. Millam, M. Klene, C. Adamo, R. Cammi, J. W. Ochterski, R. L. Martin, K. Morokuma, O. Farkas, J. B. Foresman, D. J. Fox, Wallingford, CT 2016.
- [7] a) F. Weigend, R. Ahlrichs, *Phys Chem Chem Phys* 2005, 7, 3297; b) F. Weigend, *Phys Chem Chem Phys* 2006, 8, 1057.
- [8] S. Grimme, S. Ehrlich, L. Goerigk, *J Comput Chem* 2011, 32, 1456.
- [9] T. Lu, F. Chen, *J Comput Chem* 2012, 33, 580.
